# Supplementary material for: Cutaneous Malignancies in Tattoos, a Case Series of Six Patients
Source: Curr Oncol. 2021 Nov 15;28(6):4721–37. doi: 10.3390/curroncol28060398 (PMC8628776; doi:10.3390/curroncol28060398)
Supplement: Supplementary file 1 [file curroncol-28-00398-s001.zip › curroncol-1335067-supplementary.pdf]

# Cutaneous Malignancies in Tattoos, a Case Series of Six Patients

Marieke Leijts, Hannah Schaefer, Albert Rübber, Claudio Cacchi, Thomas Rustemeyer and Sebastiaan van der Bent

Figure S1. PRISMA 2020 flow diagram for literature research considering tumors in tattoos.

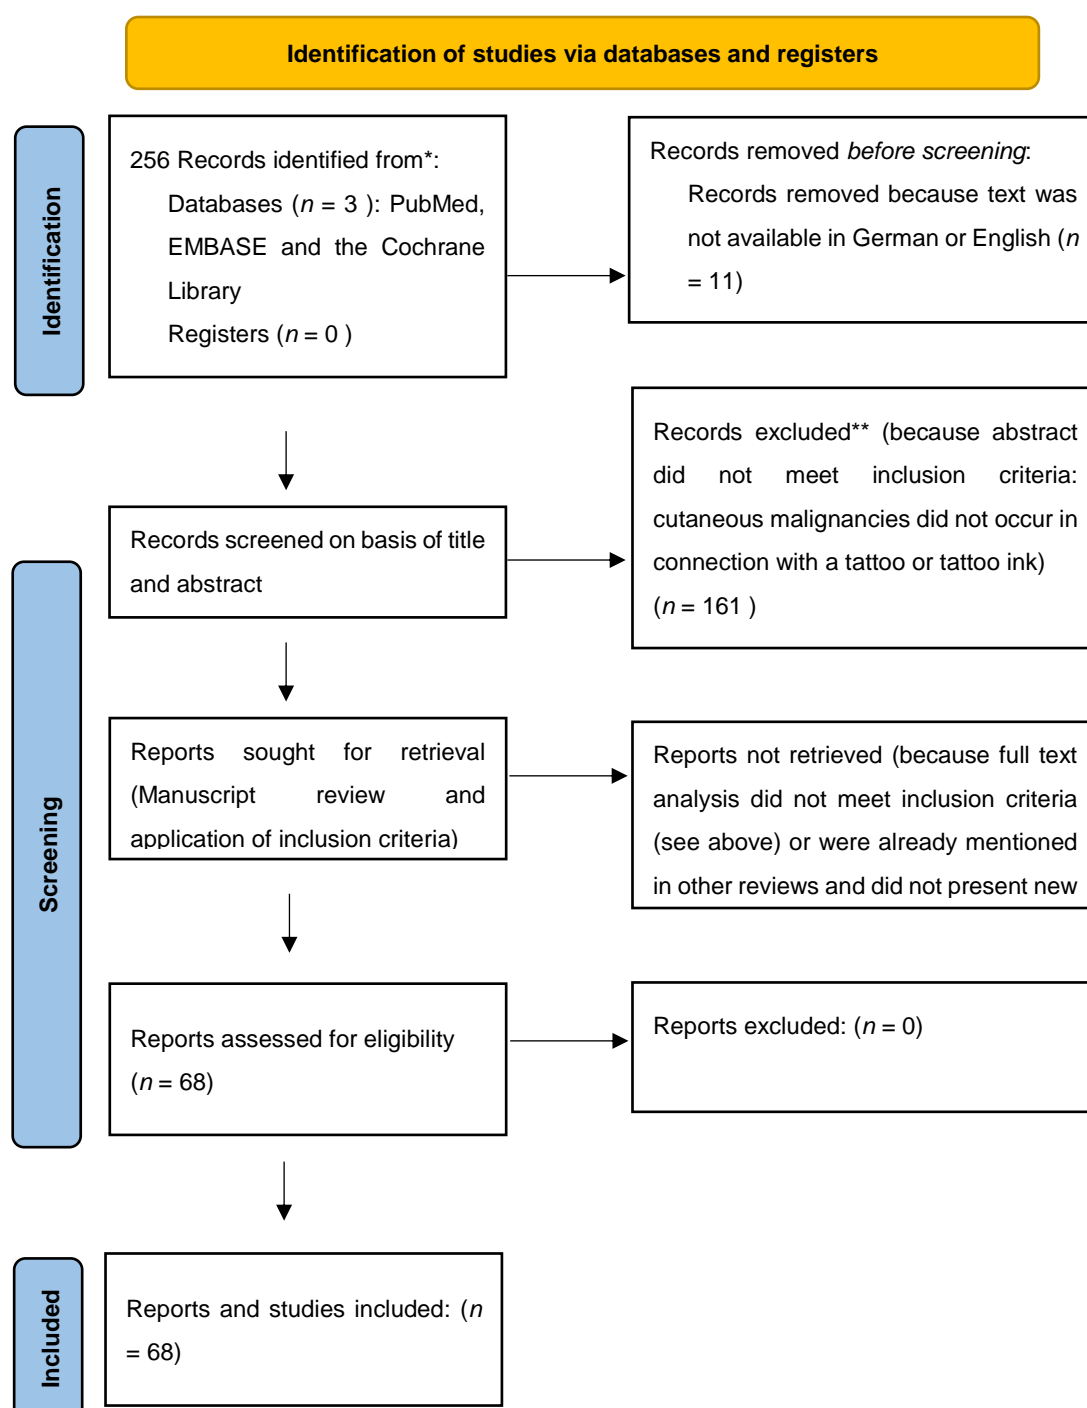

\*Consider, if feasible to do so, reporting the number of records identified from each database or register searched (rather than the total number across all databases/registers). \*\*If automation tools were used, indicate how many records were excluded by a human and how many were excluded by automation tools.

The search of Medline (PubMed, EMBASE and the Cochrane Library) provided a total of 256 results. Search Terms were (in Title or Abstract): tattoo OR ink AND melanoma ( $n=140$ ); tattoo OR ink AND basal cell carcinoma ( $n=23$ ); tattoo OR ink AND squamous cell carcinoma ( $n=51$ ); tattoo OR ink AND keratoacanthoma ( $n=26$ ); tattoo OR ink AND dermatofibrosarcoma protuberans ( $n=7$ ); tattoo OR ink AND cutaneous leiomyosarcoma ( $n=1$ ); tattoo OR ink AND cutaneous lymphoid hyperplasia ( $n=8$ ). After adjusting for language (English or German only) 245 remained. Out of these 245 references 161 were excluded due to the fact that after reading of the abstract, the paper did not meet the inclusion criteria. The remaining 84 were then read in full text mode and examined in more detail and 18 more references were excluded because they did not fit into the searching criteria or the presented cases were already mentioned in previous reviews and no new case was introduced in the study. In the end 68 references were included in the overview in table 1.

From: Page MJ, McKenzie JE, Bossuyt PM, Boutron I, Hoffmann TC, Mulrow CD, et al. The PRISMA 2020 statement: an updated guideline for reporting systematic reviews. *BMJ* 2021;372:n71. doi: 10.1136/bmj.n71

For more information, visit: <http://www.prisma-statement.org/>, accessed on 1/9/2021

Table S1: Tattoo colorants and its cleavage products as well as possible adverse effects

| Colorant                                                                                                                                  | Cleavage Products (UV/Laser/Pyrolysis)                                                                                                                                                                                                            | Reference                       |
|-------------------------------------------------------------------------------------------------------------------------------------------|---------------------------------------------------------------------------------------------------------------------------------------------------------------------------------------------------------------------------------------------------|---------------------------------|
| CI Pigment Yellow 74:<br>IUPAC: (2-[(2-methoxy-4-nitrophenyl)diazonyl]-N-(2-methoxyphenyl)-3-oxobutanamide)                               | 3-oxobutanamide, N,N0-bis(2-methoxyphenyl)urea, o-acetoacetanilide, 2-methoxyacetanilide<br>LASER: none<br>Toxic: skin irritation, serious eye irritation                                                                                         | 2004: [1], 2013: [2], 2020: [3] |
| CI Pigment Yellow 97:<br>IUPAC: N-(4-Chlor-2,5-dimethoxyphenyl)-2-[[2,5-dimethoxy-4-[(phenylamino)sulfonyl]phenyl]azo]-3-oxobutyramid     | UV: none<br>LASER: aniline                                                                                                                                                                                                                        | 2013: [2], 2020: [3]            |
| CI Pigment Yellow 138:<br>IUPAC: 4,5,6,7-tetrachloro-2-[2-(4,5,6,7-tetrachloro-1,3-dioxindene-2-yl)quinolin-8-yl]isoindole-1,3-dione      | Laser/Pyrolyse: hydrogen cyanide, benzene, Xylenes, 1,2,3,4-tetrachlorobenzene, pentachlorobenzene, 2,3,4,5-tetrachlorobenzylaldehyde, hexachlorobenzene, 4,5,6,7-tetrachloro-1,3-isobenzofuradione, 3,4,5,6-tetrachlorophthalimide<br>Toxic:n.a. | 2016: [4]<br>[5], 2020: [3]     |
| CI: Pigment Yellow 14<br>IUPAC: 2,2'-[(3,3'-Dichlor[1,1'-biphenyl]-4,4'-diyl)bis(azo)]bis[N-(2-methylphenyl)-3-oxobutyramid]              | UV: 2-methylformanilide, 2-methyl-acetanilide, 3,3'-dichlorodiphenyl, 3,3'-dichlorobenzidine<br>LASER: 3,3'-dichlorobenzidine                                                                                                                     | 2015/2007: [6,7], 2020: [3]     |
| CI: Pigment Yellow 83<br>IUPAC: 2,2'-[(3,3'-Dichlor[1,1'-biphenyl]-4,4'-diyl)bis(azo)]bis[N-(4-chlor-2,5-dimethoxyphenyl)-3-oxobutyramid] | UV: not studied<br>LASER: 3,3'-dichlorobenzidine                                                                                                                                                                                                  | 2013: [2], 2020: [3]            |
| CI: Pigment Red 22<br>IUPAC: 3-Hydroxy-4-[(2-methyl-5-nitrophenyl)azo]-N-phenylnaphthalin-2-carboxamid                                    | UV: 2-amino-4-nitrotoluene, 4-nitrotoluene<br>LASER: 2-amino-4-nitrotoluene, 4-nitrotoluene, naphthol AS                                                                                                                                          | 2004:[6], 2020:[3]              |
| CI: Pigment Red 112<br>IUPAC: 3-Hydroxy-N-(o-tolyl)-4-[(2,4,5-trichlorophenyl)azo]naphthalin-2-carboxamid                                 | UV: 2-toluidine, 2,4,5-trichloroaniline, 2-methylformanilide, 2-methylacetanilide<br>LASER: 2-toluidine, 2,4,5-trichloroaniline<br>Toxic: low (allergic skin reactions)                                                                           | 2013:[2], 2011:[8], 2020:[3]    |
| CI: Pigment Red 9<br>IUPAC: 4-[(2,5-Dichlorophenyl)azo]-3-hydroxy-N-(2-methoxyphenyl)naphthalin-2-carboxamid                              | UV: not studied<br>LASER: 2,5-dichloroaniline, 1,4-dichlorobenzene, methoxy-naphthol AS                                                                                                                                                           | 2013:[2], 2011:[8], 2020:[3]    |
| CI: Pigment Red 170<br>IUPAC: 4-[[4-(Aminocarbonyl)phenyl]azo]-N-(2-ethoxyphenyl)-3-hydroxynaphthalin-2-carboxamid                        | UV: 4-hydroxybenzamide, 4-aminobenzamide, benzamide<br>LASER/pyrolysis: Aniline, benzene, 2-ethoxyaniline, 4-aminobenzonitrile, 2-naphtol, 2 additional unknowns substances<br>Toxic: : low (allergic skin reactions)                             | 2013:[2], 2016 [4], 2020:[3]    |
| CI: Pigment Red 254                                                                                                                       | UV: none identified                                                                                                                                                                                                                               |                                 |

|                                                                                                                                                                                                                        |                                                                                                                                                                                                                                         |                                                   |
|------------------------------------------------------------------------------------------------------------------------------------------------------------------------------------------------------------------------|-----------------------------------------------------------------------------------------------------------------------------------------------------------------------------------------------------------------------------------------|---------------------------------------------------|
| IUPAC: 1,4-bis(4-chlorophenyl)-3-hydroxy-2H-pyrrolo[3,4-c]pyrrol-6-one                                                                                                                                                 | LASER/Pyrolysis: Benzene, Chlorobenzene, 4-chlorobenzonitrile                                                                                                                                                                           | 2013:[2], 2016 [4], 2020:[3]                      |
| CI: Pigment Red 202                                                                                                                                                                                                    | UV: 4-chloroaniline                                                                                                                                                                                                                     |                                                   |
| IUPAC: 2,9-dichloro-5,12-dihydroquinolino[2,3-b]acridine-7,14-dione                                                                                                                                                    | LASER: none identified                                                                                                                                                                                                                  | 2013:[2], 2020:[3]                                |
| CI: Pigment Red 122                                                                                                                                                                                                    | UV: none identified                                                                                                                                                                                                                     |                                                   |
| IUPAC: 2,9-dimethyl-5,12-dihydroquinolino[2,3-b]acridine-7,14-dione                                                                                                                                                    | LASER: none identified<br>Toxic: none classified                                                                                                                                                                                        | 2013:[2], 2020:[3]                                |
| CI: Pigment Orange 13                                                                                                                                                                                                  | UV: 3,3'-dichlorodiphenyl, 3,3'-dichlorobenzidine                                                                                                                                                                                       |                                                   |
| IUPAC: 4,4'-[(3,3'-Dichlor[1,1'-biphenyl]-4,4'-diyl)bis(azo)]bis[2,4-dihydro-5-methyl-2-phenyl-3H-pyrazol-3-on]                                                                                                        | LASER/Pyrolysis: aniline, 3,3'-dichlorobenzidine, : 3,3'-dichloro-1,1' diphenyl, Benzene, 3,3'-dichlorobenzidine, Phenylisocyanate, 3,3'-dichlorodiphenyl-4-amine, hydrogen cyanide, benzonitrile, 2-chloroaniline, 2-aminobenzonitrile | 2011:[8], 2013:[2], 2016:[4], 2018: [5], 2020:[3] |
| CI: Pigment Orange 34                                                                                                                                                                                                  | UV: 3,3'-dichlorobenzidine                                                                                                                                                                                                              |                                                   |
| IUPAC: 4,4'-[(3,3'-Dichlor[1,1'-biphenyl]-4,4'-diyl)bis(azo)]bis[2,4-dihydro-5-methyl-2-(p-tolyl)-3H-pyrazol-3-on]                                                                                                     | LASER: not studied                                                                                                                                                                                                                      | 2013:[2], 2020:[3]                                |
| CI: Pigment Orange 16                                                                                                                                                                                                  | UV: formanilide, acetanilide, 3,3'-dimethoxydiphenyl                                                                                                                                                                                    | 2013:[2]                                          |
| IUPAC: 2,2'-[(3,3'-Dimethoxy[1,1'-biphenyl]-4,4'-diyl)bis(azo)]bis[3-oxo-N-phenylbutyramid]                                                                                                                            | LASER: none identified                                                                                                                                                                                                                  | 2011:[8], 2020:[3]                                |
| CI: Pigment Violet 23                                                                                                                                                                                                  |                                                                                                                                                                                                                                         |                                                   |
| IUPAC: 2,20-Dichloro-13,31-diethyl-18,36-dioxo-4,13,22,31-tetraza-nonacyclo (19.15.0.03,19.05,17.06,14.07,12.023,35.024,32.025,30) hexatriaconta-1,3,5(17),6(14),7,9,11,15,19,21,23(35),24(32),25,27,29,33-hexadecaene | UV: none identified , LASER: none identified, Pyrolysis: Benzene, 2-amino-9-oxo-dihydroacridine-3-carbaldehyde,                                                                                                                         | 2013:[2], 2020:[3]                                |
| CI: Pigment Violet 19                                                                                                                                                                                                  | Pyrolysis: 1,2-Benzenedicarbonitrile, benzonitrile, phthalimide, UV: none identified, LASER: none identified, Component toxicity (Copper): acute oral toxicity, serious eye irritation, acute inhalation toxicity                       | 2016: [4], 2020:[3]                               |
| IUPAC : 5,12-dihydroquinolino[2,3-b]acridine-7,14-dione                                                                                                                                                                |                                                                                                                                                                                                                                         |                                                   |
| CI: Pigment Green 7                                                                                                                                                                                                    | UV: none identified                                                                                                                                                                                                                     |                                                   |
| IUPAC: Polychloro copper phthalocyanine                                                                                                                                                                                | LASER/Pyrolysis: 1,2-benzene dicarbonitrile, 2-methylbenzonitrile, benzonitrile, benzene, and the poisonous gas hydrogen cyanide (HCN)                                                                                                  | 2013:[2]                                          |
| CI: Pigment Blue 15                                                                                                                                                                                                    | UV:n.a., Laser:n.a.                                                                                                                                                                                                                     |                                                   |
| IUPAC: (29H,31H-phthalocyaninato(2-)-N29,N30,N31,N32)copper                                                                                                                                                            | Toxic: may cause respiratory irritation (Specific target organ toxicity, single exposure), suspected of causing cancer (Carcinogenicity)                                                                                                | 2016: [4], 2020:[3]                               |
| CI: Pigment Black 7                                                                                                                                                                                                    | Toxic: Chronic (Cumulative) Toxicity, Toxic to Reproduction (ECHA) suspected, Tumorigenic, Carcinogenic, irritative                                                                                                                     | 2013:[2], 2016: [4], 2020:[3]                     |
| IUPAC: Carbon Black                                                                                                                                                                                                    |                                                                                                                                                                                                                                         |                                                   |
| <b>Contamination/additives</b>                                                                                                                                                                                         |                                                                                                                                                                                                                                         |                                                   |
| CI/IUPAC: Antimony                                                                                                                                                                                                     | Tumorigenic, Carcinogenic, irritative                                                                                                                                                                                                   | 2020:[3]                                          |
| CI/IUPAC: Arsenic                                                                                                                                                                                                      | Toxic: acute & chronic toxic, Carcinogenic, irritative                                                                                                                                                                                  | 2020:[3]                                          |
| CI/IUPAC: Cadmium                                                                                                                                                                                                      | Toxic: Carcinogenic (inhalative), toxic, irritative                                                                                                                                                                                     | 2020:[3]                                          |
| CI/IUPAC: Chromium                                                                                                                                                                                                     | Toxic: Irritative, anticipated to be human carcinogen, acute toxic, cumulative lung damage                                                                                                                                              | 2020:[3]                                          |
| CI/IUPAC: Cobalt                                                                                                                                                                                                       | Toxic: probable human carcinogen, nervous system disturbance, acute toxic, irritative                                                                                                                                                   | 2020:[3]                                          |
| CI/IUPAC: Lead                                                                                                                                                                                                         | Toxic: anticipated to be human carcinogen, irritative, chronic (cumulative) toxic, mutagen                                                                                                                                              | 2020:[3]                                          |
| CI/IUPAC: Nickel                                                                                                                                                                                                       | Toxic: Skin sensitizer (Category 1), irritative (eyes, nose, throat, skin)                                                                                                                                                              | 2020:[3]                                          |
| CI: Methyl methacrylate                                                                                                                                                                                                | Toxic: Skin sensitizer (Category 1), irritative (eyes, nose, throat, skin)                                                                                                                                                              | 2020:[3]                                          |
| IUPAC: methyl 2-methylprop-2-enoate                                                                                                                                                                                    |                                                                                                                                                                                                                                         |                                                   |
| CI: Dodecyl methacrylate                                                                                                                                                                                               | Toxic: Skin sensitizer (Category 2), serious irritative (eyes, nose, throat, skin), may cause respiratory irritation                                                                                                                    | 2020:[3]                                          |
| IUPAC: dodecyl 2-methylprop-2-enoate                                                                                                                                                                                   |                                                                                                                                                                                                                                         |                                                   |
| CI: Tetradecyl methacrylate                                                                                                                                                                                            | Toxic: Skin irritation, may cause allergic skin reaction, serious eye irritation, may cause respiratory irritation                                                                                                                      | 2020:[3]                                          |
| IUPAC: tetradecyl 2-methylprop-2-enoate                                                                                                                                                                                |                                                                                                                                                                                                                                         |                                                   |
| IUPAC: Styrene                                                                                                                                                                                                         | Toxic: Skin sensitizer (Category 2), serious irritative (eyes, nose, throat, skin), acute inhalative toxicity, specific target organ toxicity; repeated exposure (Cat. 1), suspected of reproductive toxicity                           | 2020:[3]                                          |
| CI: α-Methylstyrene                                                                                                                                                                                                    | Toxic: Causes serious eye irritation, may cause respiratory irritation                                                                                                                                                                  | 2020:[3]                                          |
| IUPAC: prop-1-en-2-ylbenzene                                                                                                                                                                                           |                                                                                                                                                                                                                                         |                                                   |

|                                                                                          |                                                                                                                                                                                                                                                  |                    |
|------------------------------------------------------------------------------------------|--------------------------------------------------------------------------------------------------------------------------------------------------------------------------------------------------------------------------------------------------|--------------------|
| CI/IUPAC: Benzene                                                                        | Toxic: Carcinogenicity (Cat 1a), Skin irritation, serious eye irritation, may cause genetic effects, specific organ toxicity (Repeated exposure)                                                                                                 | 2016:[4], 2020:[3] |
| CI/IUPAC: Toluene                                                                        | Toxic: Skin irritation (Cat.2), Specific target organ toxicity, repeated exposure, Cat. 1, reproductive toxicity                                                                                                                                 | 2016:[4], 2020:[3] |
| CI/IUPAC: Naphthalene                                                                    | Toxic: Carcinogenicity (Cat. 2), acute oral toxicity                                                                                                                                                                                             | 2016:[4], 2020:[3] |
| CI/IUPAC: Biphenyl                                                                       | Toxic: Skin irritation (Cat.2), serious eye irritation, may cause respiratory irritation                                                                                                                                                         | 2016:[4], 2020:[3] |
| CI: Dimethylcyclsiloxanes (oligomers)<br>IUPAC: 2,2-dimethyl-1,3,5,2,4,6-trioxatrisilane | Toxic: Reproductive toxicity, Cat. 2                                                                                                                                                                                                             | 2016:[4], 2020:[3] |
| CI/IUPAC: Silicone                                                                       | Toxic: Serious eye irritation (Cat. 2b)                                                                                                                                                                                                          | 2016:[4], 2020:[3] |
| CI: Ethylene glycol<br>IUPAC: ethane-1,2-diol                                            | Toxic: acute oral toxicity, Specific target organ toxicity, repeated exposure (kidney), Cat. 2                                                                                                                                                   | 2016:[4], 2020:[3] |
| CI: 1-Methyl-2-pyrrolidinone<br>IUPAC: 1-methylpyrrolidin-2-one                          | Toxic: Skin irritation (Cat. 2), serious eye irritation, Specific target organ toxicity, (single exposure; Respiratory tract irritation), Reproductive toxicity(teratogenic effects)                                                             | 2016:[4], 2020:[3] |
| CI: N-Vinylpyrrolidone<br>IUPAC: 1-ethenylpyrrolidin-2-one                               | Toxic: Carcinogenicity (Cat. 2), acute oral toxicity, acute dermal toxicity, serious eye irritation, acute inhalation toxicity, may cause respiratory irritation (Specific target organ toxicity, single exposure; Respiratory tract irritation) | 2016:[4], 2020:[3] |

## References

1. Cui, Y.; Spann, A.P.; Couch, L.H.; Gopee, N.V.; Evans, F.E.; Churchwell, M.I.; Williams, L.D.; Doerge, D.R.; Howard, P.C. Photodecomposition of Pigment Yellow 74, a Pigment Used in Tattoo Inks. *Photochem. Photobiol.* **2004**, *80*, 175–184.
2. Wezel, K. Untersuchung des Verhaltens von Tätowiertinten und Pigmenten unter Lichteinfluss. Thesis, University of Giessen, Giessen, Germany, 2013.
3. PubCHEM. National Center for Biotechnology Information. PubChem Database. Carbon, CID=5462310, PubCHEM2020. Available online: <http://URL> (accessed on 1 February 2021)
4. Schreiber, I.; Hutzler, C.; Andree, S.; Laux, P.; Luch, A. Identification and hazard prediction of tattoo pigments by means of pyrolysis—gas chromatography/mass spectrometry. *Arch. Toxicol.* **2016**, *4*, 1639–1650.
5. Hering, H.; Sung, A.Y.; Röder, N.; Hutzler, C.; Berlien, H.-P.; Laux, P.; Luch, A.; Schreiber, I. Laser Irradiation of Organic Tattoo Pigments Releases Carcinogens with 3,3'-Dichlorobenzidine Inducing DNA Strand Breaks in Human Skin Cells. *J. Investig. Dermatol.* **2018**, *138*, 2687–2690.
6. Vasold, R.; Naarmann, N.; Ulrich, H.; Fischer, D.; König, B.; Landthaler, M.; Bäuml, W. Tattoo pigments are cleaved by laser light—the chemical analysis in vitro provide evidence for hazardous compounds. *Photochem. Photobiol.* **2004**, *80*, 185–190.
7. Engel, E.; Spannberger, A.; Vasold, R.; König, B.; Landthaler, M.; Bäuml, W. Photochemical cleavage of a tattoo pigment by UVB radiation or natural sunlight. *J. Dtsch. Dermatol. Ges.* **2007**, *5*, 583–589.
8. Gaugler, S. Analysis of bioactive compounds in tattoo inks before and after irradiation with sunlight using HPTLC and in situ detection with vibrio fischeri. Thesis, University of Hohenheim, Stuttgart, Germany, 2011.
9. Schreiber, I.; Hutzler, C.; Laux, P.; Berlien, H.-P.; Luch, A. Formation of highly toxic hydrogen cyanide upon ruby laser irradiation of the tattoo pigment phthalocyanine blue. *Sci. Rep.* **2015**, *5*, 12915.
